# Supplementary material for: Adipose-Derived Mesenchymal Stem Cells Ameliorating Pseudomonas aeruginosa–induced Acute Lung Infection via Inhibition of NLRC4 Inflammasome
Source: Frontiers journal article supplement (doi:10.3389/fcimb.2020.581535), 2021-01-08
Supplement: Data_Sheet_1.PDF [file Data_Sheet_1.PDF]

## Supplementary tables for extended numerical values and statistic results in Figures

**Fig. 1A**

|                | <b>24 hours (N)</b>   | <b>36 hours (N)</b>   |
|----------------|-----------------------|-----------------------|
| <i>PA</i>      | $30.05 \pm 2.728$ (4) | $35.74 \pm 3.774$ (5) |
| <i>PA+PBS</i>  | $37.33 \pm 2.19$ (4)  | $35.38 \pm 1.14$ (5)  |
| <i>PA+ASCs</i> | $12.14 \pm 2.58$ (5)  | $5.80 \pm 1.47$ (5)   |

p= 0.7258 for PA vs. PA+PBS in 24 hours

p= 0.0002 for PA+PBS vs. PA+ASCs in 24 hours

p= 0.0201 for PA vs. PA+PBS in 36 hours

p < 0.0001 for PA+PBS vs. PA+ASCs in 36 hours

N in brackets represents as sample size for each group. Same as below.

**Fig. 1B, MIP-2 in lung:**

|                | <b>24 hours (N)</b>   | <b>36 hours (N)</b>    |
|----------------|-----------------------|------------------------|
| <i>PA</i>      | $130.8 \pm 7.920$ (4) | $91.45 \pm 16.68$ (5)  |
| <i>PA+PBS</i>  | $117.90 \pm 3.40$ (4) | $104.30 \pm 11.88$ (5) |
| <i>PA+ASCs</i> | $78.91 \pm 5.06$ (4)  | $30.93 \pm 4.55$ (5)   |

p= 0.1981 for PA vs. PA+PBS in 24 hours

p= 0.0007 for PA+PBS vs. PA+ASCs in 24 hours

p= 0.5938 for PA vs. PA+PBS in 36 hours

p= 0.0002 for PA+PBS vs. PA+ASCs in 36 hours

**Fig. 1B, MIP-2 in BALF:**

|                | <b>24 hours (N)</b>   | <b>36 hours (N)</b>    |
|----------------|-----------------------|------------------------|
| <i>PA</i>      | $180.8 \pm 32.17$ (4) | $175.4 \pm 21.32$ (4)  |
| <i>PA+PBS</i>  | $217.90 \pm 3.40$ (4) | $332.70 \pm 58.33$ (4) |
| <i>PA+ASCs</i> | $93.91 \pm 8.63$ (4)  | $150.50 \pm 5.32$ (4)  |

p= 0.039 for PA vs. PA+PBS in 24 hours

p <0.0001 for PA+PBS vs. PA+ASCs in 24 hours

p= 0.1936 for PA vs. PA+PBS in 36 hours

p= 0.0358 for PA+PBS vs. PA+ASCs in 36 hours

**Fig. 1B, TNF- $\alpha$  in lung:**

|                | <b>24 hours (N)</b>   | <b>36 hours (N)</b>   |
|----------------|-----------------------|-----------------------|
| <i>PA</i>      | 40.77 $\pm$ 7.205 (4) | 26.59 $\pm$ 7.527 (5) |
| <i>PA+PBS</i>  | 36.49 $\pm$ 0.64 (4)  | 29.23 $\pm$ 3.03 (5)  |
| <i>PA+ASCs</i> | 23.96 $\pm$ 2.86 (5)  | 3.94 $\pm$ 1.13 (5)   |

p= 0.006 for PA vs. PA+PBS in 24 hours

p= 0.0036 for PA+PBS vs. PA+ASCs in 24 hours

p= 0.2689 for PA vs. PA+PBS in 36 hours

p= 0.0008 for PA+PBS vs. PA+ASCs in 36 hours

**Fig. 1B, TNF- $\alpha$  in BALF:**

|                | <b>24 hours (N)</b>    | <b>36 hours (N)</b>    |
|----------------|------------------------|------------------------|
| <i>PA</i>      | 165.4 $\pm$ 30.65 (4)  | 177.9 $\pm$ 30.18 (4)  |
| <i>PA+PBS</i>  | 242.90 $\pm$ 29.53 (4) | 227.90 $\pm$ 48.22 (4) |
| <i>PA+ASCs</i> | 109.30 $\pm$ 35.24 (4) | 100.70 $\pm$ 3.42 (4)  |

p= 0.9527 for PA vs. PA+PBS in 24 hours

p= 0.0272 for PA+PBS vs. PA+ASCs in 24 hours

p= 0.4620 for PA vs. PA+PBS in 36 hours

p= 0.0390 for PA+PBS vs. PA+ASCs in 36 hours

**Fig. 1C**

|                | <b>in BALF (N)</b>     | <b>in lung (N)</b>   |
|----------------|------------------------|----------------------|
| <i>PA</i>      | 314.0 $\pm$ 49.46 (3)  | 10240 $\pm$ 3416 (3) |
| <i>PA+PBS</i>  | 332.60 $\pm$ 91.98 (5) | 10847 $\pm$ 2434 (5) |
| <i>PA+ASCs</i> | 12.33 $\pm$ 1.45 (3)   | 4348 $\pm$ 1248 (5)  |

p= 0.0015 for PA vs. PA+PBS in BALF in 36 hours

p=0.0401 for PA+PBS vs. PA+ASCs in BALF in 36 hours;

p= 0.7904 for PA vs. PA+PBS in lung in 36 hours

p=0.0448 for PA+PBS vs. PA+ASCs in lung in 36 hours

**Fig. 1D**

|                | <b>24 hours (N)</b> | <b>36 hours (N)</b> |
|----------------|---------------------|---------------------|
| <i>PA</i>      | 0.6400 ± 0.040 (3)  | 0.7350 ± 0.0350 (3) |
| <i>PA+PBS</i>  | 0.840 ± 0.040 (3)   | 1.010 ± 0.010 (3)   |
| <i>PA+ASCs</i> | 0.575 ± 0.025 (3)   | 0.640 ± 0.040 (3)   |

p= 0.63 for PA vs. PA+PBS in 24 hours

p= 0.0303 for PA+PBS vs. PA+ASCs in 24 hours

p= 0.754 for PA vs. PA+PBS in 24 hours

p= 0.0122 for PA+PBS vs. PA+ASCs in 36 hours

**Fig. 2C: IL-1 $\beta$ :**

|                            | <b>in BALF (N)</b> | <b>in lung (N)</b> |
|----------------------------|--------------------|--------------------|
| <i>WT</i>                  | 12.54 ± 1.00 (3)   | 209.67 ± 23.86 (3) |
| <i>NLRC4<sup>-/-</sup></i> | 1.84 ± 1.00 (3)    | 97.69 ± 23.86 (3)  |

p= 0.0004 for WT vs. *NLRC4<sup>-/-</sup>* in BALF

p= 0.009 for WT vs. *NLRC4<sup>-/-</sup>* in lung

**Fig. 2C: IL-18:**

|                            | <b>in BALF (N)</b>   | <b>in lung (N)</b> |
|----------------------------|----------------------|--------------------|
| <i>WT</i>                  | 407.754 ± 97.848 (3) | 469.99 ± 13.81 (3) |
| <i>NLRC4<sup>-/-</sup></i> | 259.185 ± 97.848 (3) | 173.09 ± 13.81 (3) |

p= 0.203536 for WT vs. *NLRC4<sup>-/-</sup>*

p= 0.0002 for WT vs. *NLRC4<sup>-/-</sup>*

**Fig. 2E:**

|                            | PA(MOI=1) (N)      | PA(MOI=5) (N)     | PA(MOI=10) (N)   |
|----------------------------|--------------------|-------------------|------------------|
| <i>WT</i>                  | 157.88 ± 28.95 (3) | 89.08 ± 12.00 (3) | 48.65 ± 8.14 (3) |
| <i>NLRC4<sup>-/-</sup></i> | 16.54 ± 28.95 (3)  | 19.97 ± 12.00 (3) | 18.63 ± 8.14 (3) |

p = 0.0081 for WT vs. *NLRC4<sup>-/-</sup>*

p = 0.0045 for WT vs. *NLRC4<sup>-/-</sup>*

p = 0.021 for WT vs. *NLRC4<sup>-/-</sup>*

**Fig. 2F:**

|                            | PA(MOI=1) (N)     | PA(MOI=5) (N)     | PA(MOI=10) (N)    |
|----------------------------|-------------------|-------------------|-------------------|
| <i>WT</i>                  | 9.329 ± 0.640 (3) | 6.329 ± 0.510 (3) | 5.329 ± 0.510 (3) |
| <i>NLRC4<sup>-/-</sup></i> | 1.450 ± 0.640 (3) | 0.950 ± 0.510 (3) | 1.950 ± 0.510 (3) |

p = 0.0065 for WT vs. *NLRC4<sup>-/-</sup>*

p = 0.0088 for WT vs. *NLRC4<sup>-/-</sup>*

p = 0.022 for WT vs. *NLRC4<sup>-/-</sup>*

**Fig. 3D:**

|                | IL-18 (N)          | IL-1β (N)         |
|----------------|--------------------|-------------------|
| <i>PA+PBS</i>  | 532.70 ± 96.16 (3) | 107.30 ± 3.18 (3) |
| <i>PA+ASCs</i> | 208.40 ± 47.02 (3) | 37.61 ± 18.82 (3) |

p = 0.0388 for PA+PBS vs. PA+ASCs in IL-18

p = 0.0217 for PA+PBS vs. PA+ASCs in IL-1β

**Fig.3G:**

|                | IL-18 (N)          | IL-1β (N)          |
|----------------|--------------------|--------------------|
| <i>PA+PBS</i>  | 785.50 ± 30.91 (3) | 475.20 ± 50.61 (3) |
| <i>PA+ASCs</i> | 632.00 ± 12.17 (3) | 155.00 ± 75.18 (3) |

p = 0.0099 for PA+PBS vs. PA+ASCs in IL-18

p = 0.0242 for PA+PBS vs. PA+ASCs in IL-1 $\beta$

**Fig.3H:**

|                            | <b>IL-18 (N)</b>     | <b>IL-1<math>\beta</math> (N)</b> |
|----------------------------|----------------------|-----------------------------------|
| <i>PA+THP-1</i>            | 57.00 $\pm$ 1.50 (3) | 503.00 $\pm$ 2.50 (3)             |
| <i>PA+ASCs: THP-1(1:1)</i> | 24.06 $\pm$ 0.50 (3) | 295.00 $\pm$ 1.50 (3)             |

p = 0.0023 for PA+ THP-1 vs. PA+ ASCs: THP-1(1:1) in IL-18

p = 0.0002 for PA+ THP-1 vs. PA+ ASCs: THP-1(1:1) in IL-1 $\beta$

**Fig.3J:**

|                          | <b>IL-18 (N)</b>    | <b>IL-1<math>\beta</math> (N)</b> |
|--------------------------|---------------------|-----------------------------------|
| <i>PA+ Ma</i>            | 9.33 $\pm$ 0.50 (4) | 571.90 $\pm$ 0.50 (4)             |
| <i>PA+ ASCs: Ma(1:5)</i> | 6.02 $\pm$ 0.02 (3) | 25.19 $\pm$ 0.50 (3)              |

p = 0.0221 for PA+ Ma vs. PA+ PA+ ASCs: Ma(1:5)

p < 0.0001 for PA+ Ma vs. PA+ PA+ ASCs: Ma(1:5)

**Fig. 3I:**

|                |                       |
|----------------|-----------------------|
| <i>PA+PBS</i>  | 1.299 $\pm$ 0.112 (8) |
| <i>PA+ASCs</i> | 0.479 $\pm$ 0.077 (9) |

p < 0.0001 for PA+PBS vs. PA+ASCs

**Fig. 3K:**

|                       |                        |
|-----------------------|------------------------|
| <i>PA+THP-1</i>       | 34.55 $\pm$ 0.7500 (3) |
| <i>PA+ASCs: THP-1</i> | 55.25 $\pm$ 1.450 (3)  |

p = 0.0062 for PA+ THP-1 vs. PA+ ASCs: THP-1

**Fig. 5A-B:**

|                           | <b>IL-18 (N)</b>       | <b>IL-1<math>\beta</math> (N)</b> |
|---------------------------|------------------------|-----------------------------------|
| <i>PA+THP-1</i>           | 227.40 $\pm$ 17.56 (3) | 63.00 $\pm$ 2.50 (3)              |
| <i>PA+ THP-1+ rhSTC-1</i> | 59.77 $\pm$ 2.25 (3)   | 34.06 $\pm$ 0.50 (3)              |

p = 0.0077 for PA+ THP-1 vs. PA+ THP-1+ rhSTC-1 in IL-18

p = 0.0052 for PA+ THP-1 vs. PA+ THP-1+ rhSTC-1 in IL-1 $\beta$

**Fig. 5D:**

|                       |                  |
|-----------------------|------------------|
| <i>PA+THP-1</i>       | 495 $\pm$ 38 (4) |
| <i>PA+ASCs: THP-1</i> | 835 $\pm$ 19 (4) |

p = 0.0002 for PA vs. PA+ ASCs: THP-1

**Fig. 5E:**

|                       |                    |
|-----------------------|--------------------|
| <i>ASCs: THP-1</i>    | 2017 $\pm$ 328 (5) |
| <i>PA+ASCs: THP-1</i> | 3032 $\pm$ 79 (7)  |

p = 0.0055 for ASCs: THP-1 vs. PA+ ASCs: THP-1

**Fig. 5F-G:**

|                | <b>in BALF (N)</b> | <b>in lung (N)</b> |
|----------------|--------------------|--------------------|
| <i>PA+PBS</i>  | 706 $\pm$ 125 (3)  | 2207 $\pm$ 95 (3)  |
| <i>PA+ASCs</i> | 1202 $\pm$ 64 (3)  | 3158 $\pm$ 104 (3) |

p = 0.0212 for PA+PBS vs. PA+ASCs in lung

p = 0.0243 for PA+PBS vs. PA+ASCs in BALF
